# Supplementary material for: Cell invasive amyloid assemblies from SARS-CoV-2 peptides can form multiple polymorphs with varying neurotoxicity
Source: Royal Society of Chemistry journal article supplement (doi:10.1039/d4nr03030c), 2024-01-01
Supplement: d4nr03030c1.pdf [file d4nr03030c1.pdf]

Supporting information for:

# Cell invasive amyloid assemblies from SARS-CoV-2 peptides can form multiple polymorphs with varying neurotoxicity

Oana Sanislav<sup>1</sup>, Rina Tetaj<sup>2,3</sup>, Metali<sup>3</sup>, Julian Ratcliffe<sup>4</sup>, William Phillips<sup>3</sup>, Annaleise Klein<sup>5</sup>, Ashish Sethi,<sup>5</sup> Jiangtao Zhou,<sup>6</sup> Raffaele Mezzenga,<sup>6</sup> Sina Saxer,<sup>2</sup> Mirren Charnley<sup>7,8,9</sup>, Sarah Annesley<sup>1</sup>, Nicholas P Reynolds\*<sup>3</sup>

1. Department of Microbiology, Anatomy, Physiology and Pharmacology, La Trobe University, Melbourne, Australia
2. Institute for Chemistry and Bioanalytics, School of Life Sciences, FHNW, Muttenz, Switzerland
3. Department of Biochemistry and Chemistry, La Trobe Institute for Molecular Science (LIMS), La Trobe University, Melbourne, Australia
4. Bio Imaging Platform, La Trobe University, Melbourne, Australia
5. Australian Nuclear Science and Technology Organisation (ANSTO), Australian Synchrotron, Clayton, VIC, 3168, Australia
6. Department of Health Sciences and Technology, ETH Zurich, Schmelzbergstrasse 9, LFO, E23, 8092, Zurich, Switzerland
7. Centre for Optical Sciences, Faculty of Science Engineering and Technology, Swinburne University of Technology, Hawthorn, Victoria 3122, Australia
8. Immune Signalling Laboratory, Peter MacCallum Cancer Centre, Parkville, Victoria 3000, Australia

## Supplementary Materials and Methods

### Circular Dichroism Spectroscopy (CD)

CD spectroscopy was performed using an AVIV 410-SF CD spectrometer. Spectra were collected between 190 and 260 nm in PBS at 1 mg mL<sup>-1</sup> using 1 mm quartz cuvettes with a step size of 0.5 nm and 2 s averaging time. Data were analysed using the BeStSel (Beta Structure Selection) method of secondary structure determination.<sup>34</sup> HT values were monitored in order to select a optimum wavelength range for secondary structure determination. HT values below 700 V are considered to produce reliable data therefore secondary structures analysis was only performed between 260-200 nm for ILLIIM and RNYIAQVD.

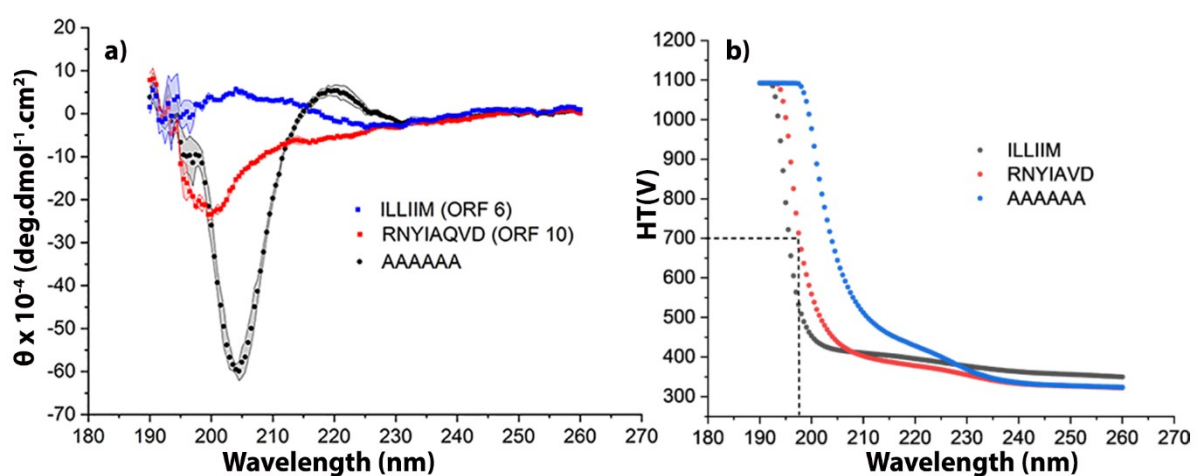

Figure S1: a) Circular dichroism of ILLIIM, RNYIAQVD and AAAAAA assemblies in PBS at 1 mgmL<sup>-1</sup>, b) high tension (wavelength dependent gain) used to determine optimum region for secondary structure determination (e.g. all HT values > 700 V are considered unsuitable).

Table S1: Secondary Structure Determination from CD spectra

|                 | Left Twisted $\beta$ -Sheet | Right Twisted $\beta$ -Sheet | Relaxed $\beta$ -Sheet | $\beta$ -turn | Total $\beta$ -sheet | $\alpha$ -helix | unclassified | RMSD  |
|-----------------|-----------------------------|------------------------------|------------------------|---------------|----------------------|-----------------|--------------|-------|
| <b>RNYIAQVD</b> | 0                           | 77.6                         | 0                      | 0             | 77.6                 | 22.4            | 0            | 3.763 |
| <b>ILLIIM</b>   | 20.8                        | 11.9                         | 38.7                   | 28.6          | 100                  | 0               | 0            | 1.054 |

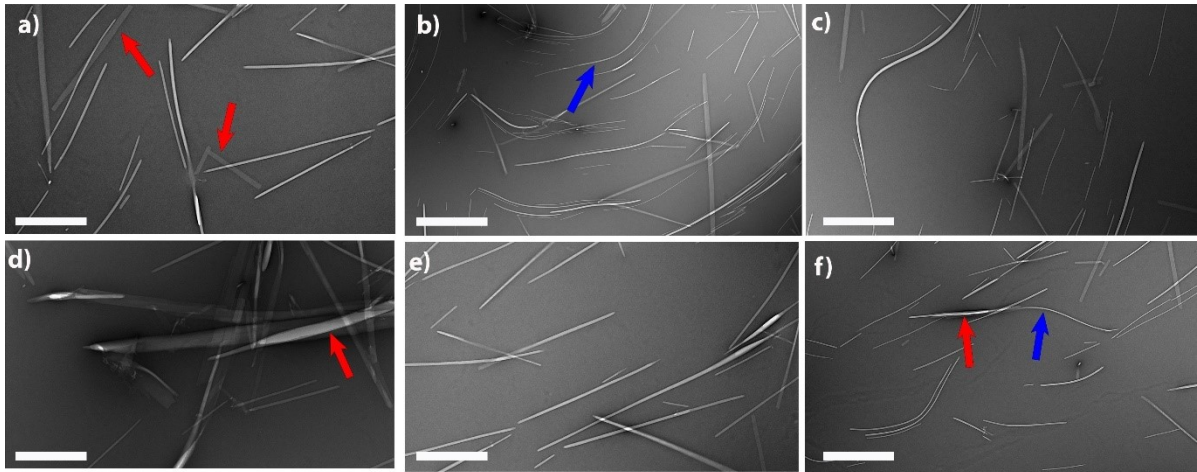

Figure S2: Additional TEM figures of ILLIIM assemblies, red arrows highlight crystalline polymorphs, blue arrows highlight crystalline polymorphs. Scale bars a) = 200 nm, b) = 600 nm, c) = 400 nm, d) = 200 nm, e) = 200 nm, f) = 400 nm

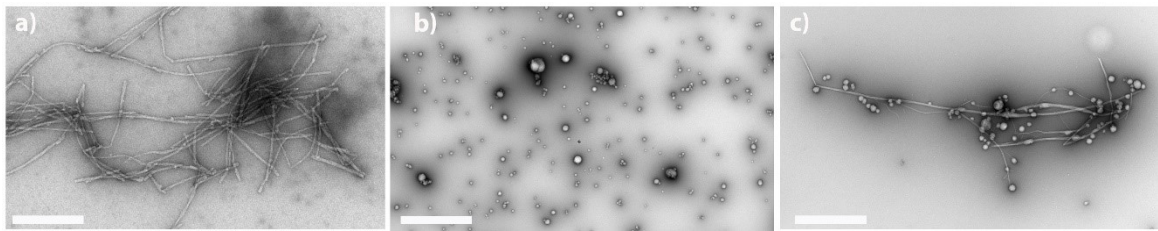

Figure S3: Additional TEM figures of RNYIAQVD assemblies, showing a) fibrillar polymorphs, b) oligomers, c) mixed populations of oligomers and fibrils. Scale bars a) = 200 nm, b) = 1000 nm, c) = 600 nm.

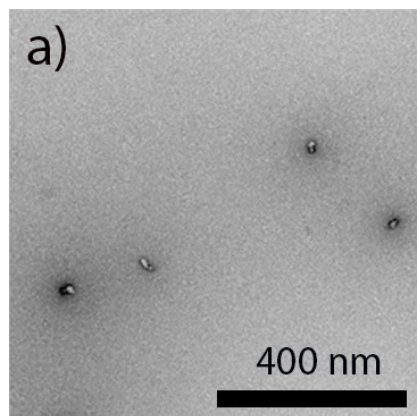

Figure S4: TEM image of small amorphous aggregates formed by the control peptide AAAAAA

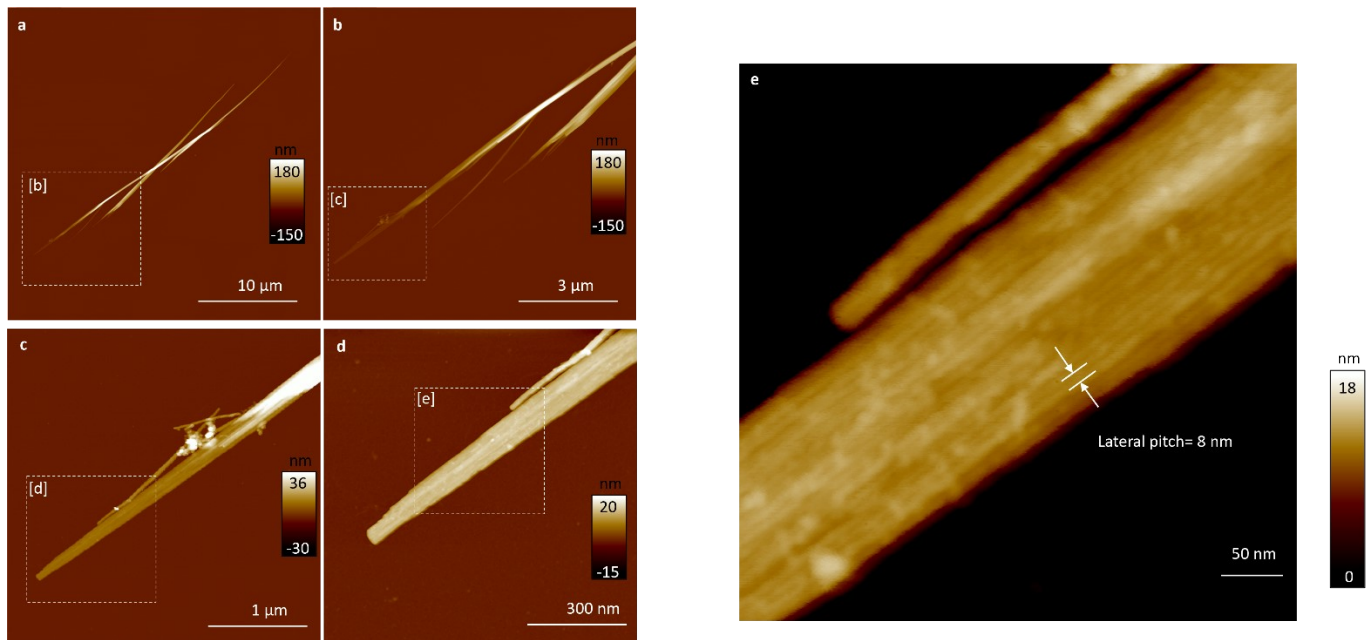

Figure S5: Additional AFM images showing that ILLIIM crystals are made from laterally associated protofilaments with a diameter of 8 nm.

Table S2: Fitting Parameters used to fit SAXS plots in figure 4 (NB. for  $\chi^2_R$  a perfect fit = 1)

|          | Form Factor Used  | Length (nm)                    | Width (nm) | Thickness (nm) | Reduced Chi2 ( $\chi^2_R$ ) |
|----------|-------------------|--------------------------------|------------|----------------|-----------------------------|
| ILLIIM   | Flattened bicelle | 105.34                         | 38.84      | 10             | 0.81                        |
| RNYIAQVD | Flexible cylinder | $3.17 \times 10^{32} (\infty)$ | 50.2       | n/a            | 1.15                        |
| AAAAAA   | Flexible cylinder | 149.6                          | 21.9       | n/a            | 0.35 bad fit                |
